# Supplementary material for: Controllable synthesis of various V2O5micro-/nanostructures as high performance cathodes for lithium ion batteries
Source: Royal Society of Chemistry journal article supplement (doi:10.1039/c6ce02365g), 2016-12-20
Supplement: c6ce02365g1.pdf [file c6ce02365g1.pdf]

## **Supplementary Information**

### **Controllable Synthesis of Various V<sub>2</sub>O<sub>5</sub> Micro-/Nanostructures as High Performance Cathode for Lithium Ion Batteries**

Hong Yu,<sup>a</sup> Jun Yang<sup>a</sup> and Haosen Fan<sup>\*a</sup>

<sup>a</sup> School of Materials Science and Engineering, Nanyang Technological University, 50 Nanyang Avenue, Singapore 639798

\*

00-041-1426

Status: Primary QM: Star Pressure/Temperature: Ambient Chemical Formula: V<sub>2</sub>O<sub>5</sub>  
Empirical Formula: O<sub>5</sub>V<sub>2</sub> Weight %: O43.98 V56.02 Atomic %: O71.43 V28.57  
Compound Name: Vanadium Oxide Mineral Name: Shcherbinaite, syn

Radiation: CuK $\alpha$  : 1.5418 Å Filter: Graph Mono d-Spacing: Diff. Cutoff: 15.00 Intensity: Diffractometer  
I/c: 1.6

SYS: Orthorhombic SPGR: Pmmn (59)

Author's Cell [ AuthCell a: 11.516(4) Å AuthCell b: 3.5656(4) Å AuthCell c: 4.3727(4) Å

AuthCell Vol: 179.55 Å<sup>3</sup> AuthCell Z: 2.00 AuthCell MolVol: 89.78 ]

Author's Cell Axial Ratio [ c/a: 0.380 a/b: 3.230 c/b: 1.226 ]

Density [ Dcalc: 3.364 g/cm<sup>3</sup> Dmeas: 3.32 g/cm<sup>3</sup> ] SS/FOM: F(30) = 92.1(0.0096, 34)

Temp: 298.000 K (Ambient temperature assigned by ICDD editor) Color: Dark orange

Space Group: Pmmn (59) Molecular Weight: 181.88

Crystal Data [ XtlCell a: 4.373 Å XtlCell b: 11.516 Å XtlCell c: 3.566 Å XtlCell : 90.00° XtlCell : 90.00°

XtlCell : 90.00° XtlCell Vol: 179.55 Å<sup>3</sup> XtlCell Z: 2.00 ]

Crystal Data Axial Ratio [ c/a: 0.815 a/b: 0.380 c/b: 0.310 ]

Reduced Cell [ RedCell a: 3.566 Å RedCell b: 4.373 Å RedCell c: 11.516 Å RedCell : 90.00°

RedCell : 90.00° RedCell : 90.00° RedCell Vol: 179.55 Å<sup>3</sup> ]

: =2.25 calc

Atomic parameters are cross-referenced from PDF entry 04-007-0398

ADP Type: B Origin: O2

Crystal (Symmetry Allowed): Centrosymmetric

SG Symmetry Operators:

| Seq | Operator | Seq | Operator    | Seq | Operator    | Seq | Operator        |
|-----|----------|-----|-------------|-----|-------------|-----|-----------------|
| 1   | x,y,z    | 3   | -x+1/2,y,z  | 5   | x,-y+1/2,z  | 7   | -x+1/2,-y+1/2,z |
| 2   | -x,-y,-z | 4   | x+1/2,-y,-z | 6   | -x,y+1/2,-z | 8   | x+1/2,y+1/2,-z  |

Atomic Coordinates:

| Atom | Num | Wyckoff | Symmetry | x       | y    | z      | SOF | Biso | AET |
|------|-----|---------|----------|---------|------|--------|-----|------|-----|
| V    | 1   | 4f      | .m.      | 0.10118 | 0.25 | 0.8917 | 1.0 | 0.54 | 5-a |
| O    | 2   | 4f      | .m.      | 0.1043  | 0.25 | 0.531  | 1.0 | 1.21 | 1#a |
| O    | 3   | 4f      | .m.      | -0.0689 | 0.25 | 0.003  | 1.0 | 0.79 | 3#a |
| O    | 4   | 2a      | mm2      | 0.25    | 0.25 | 0.001  | 1.0 | 0.9  | 2#a |

Fig. S1 ICSD data of V<sub>2</sub>O<sub>5</sub>.

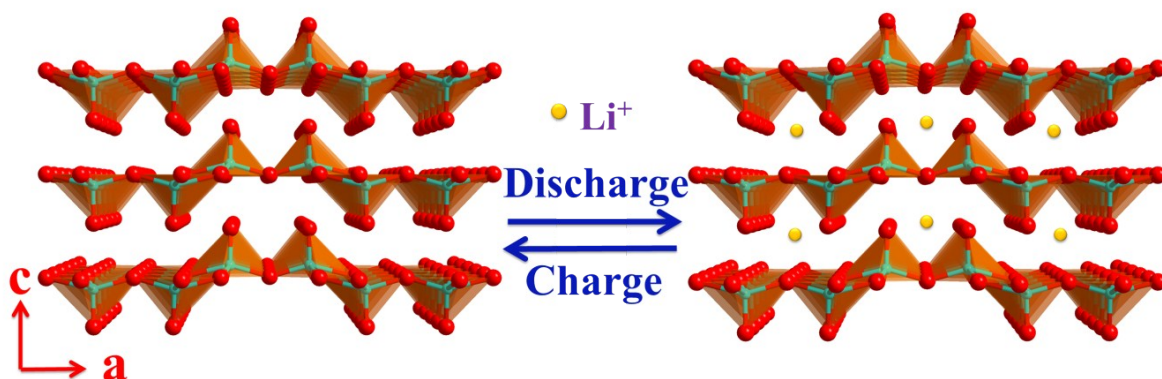

Fig. S2 Schematic illustration showing fast Li<sup>+</sup> transportation along the a-b plane of layered V<sub>2</sub>O<sub>5</sub> structure.

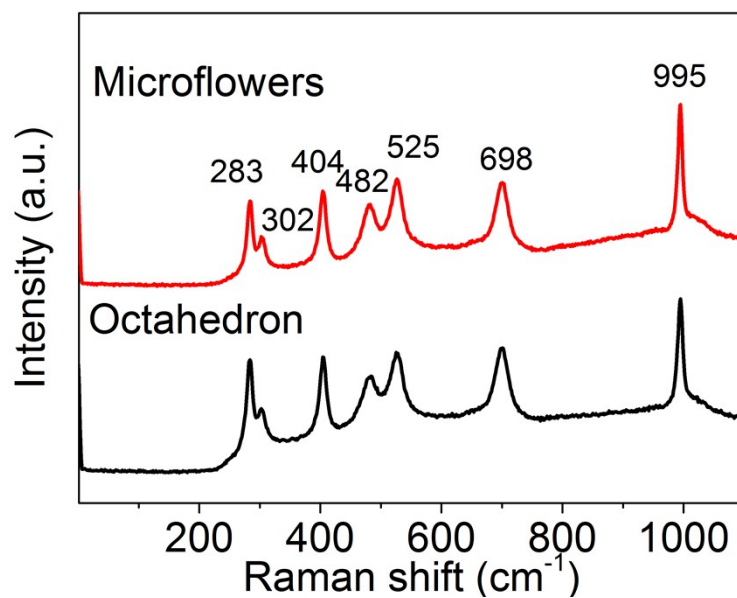

**Fig. S3** Raman spectra of the  $\text{V}_2\text{O}_5$  microflowers and octahedrons.

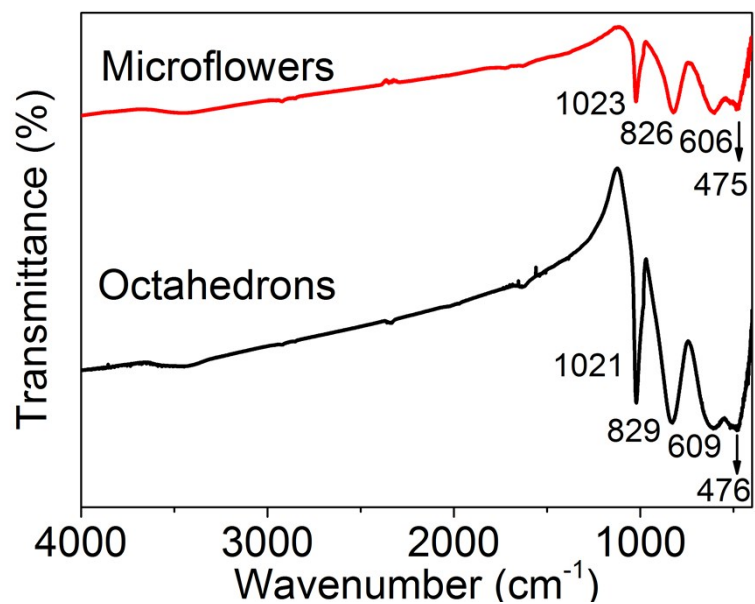

**Fig. S4** FTIR spectra of the  $\text{V}_2\text{O}_5$  microflowers and octahedrons.
